# Supplementary material for: Endothelial Cell Orientation and Polarity Are Controlled by Shear Stress and VEGF Through Distinct Signaling Pathways
Source: PubMed Central journal article supplement (PMC7960671; doi:10.3389/fphys.2020.623769), 2021-03-02
Supplement: Table_1.pdf [file Table_1.pdf]

**Suppl Table 1**

|                 | Alignment |                   | Polarity |                   |
|-----------------|-----------|-------------------|----------|-------------------|
|                 |           | Adjusted P Value  |          | Adjusted P Value  |
| S 0 vs. S 0,5   | ns        | >0,9999           | ns       | >0,9999           |
| S 0 vs. S 10    | ns        | >0,9999           | ns       | >0,9999           |
| S 0 vs. S 200   | ns        | 0,9985            | ns       | 0,9365            |
| S 0 vs. L 0     | ns        | 0,9996            | ***      | <b>0,0003</b>     |
| S 0 vs. L 0,5   | ns        | 0,1403            | ns       | 0,0599            |
| S 0 vs. L 10    | ns        | >0,9999           | ns       | 0,9989            |
| S 0 vs. L 200   | ns        | 0,1884            | ns       | >0,9999           |
| S 0 vs. H 0     | ns        | 0,1885            | ns       | >0,9999           |
| S 0 vs. H 0,5   | ns        | 0,3268            | ***      | <b>0,0005</b>     |
| S 0 vs. H 10    | ns        | >0,9999           | *        | <b>0,0119</b>     |
| S 0 vs. H 200   | ****      | <b>&lt;0,0001</b> | ns       | 0,0824            |
| S 0,5 vs. S 10  | ns        | >0,9999           | ns       | >0,9999           |
| S 0,5 vs. S 200 | ns        | 0,992             | ns       | 0,9148            |
| S 0,5 vs. L 0   | ns        | 0,9969            | ***      | <b>0,0002</b>     |
| S 0,5 vs. L 0,5 | ns        | 0,2112            | *        | <b>0,0496</b>     |
| S 0,5 vs. L 10  | ns        | >0,9999           | ns       | 0,9995            |
| S 0,5 vs. L 200 | ns        | 0,1237            | ns       | >0,9999           |
| S 0,5 vs. H 0   | ns        | 0,1237            | ns       | >0,9999           |
| S 0,5 vs. H 0,5 | ns        | 0,4454            | ***      | <b>0,0007</b>     |
| S 0,5 vs. H 10  | ns        | >0,9999           | *        | <b>0,0148</b>     |
| S 0,5 vs. H 200 | ****      | <b>&lt;0,0001</b> | ns       | 0,0981            |
| S 10 vs. S 200  | ns        | 0,9995            | ns       | 0,8855            |
| S 10 vs. L 0    | ns        | 0,9999            | ***      | <b>0,0002</b>     |
| S 10 vs. L 0,5  | ns        | 0,1117            | *        | <b>0,0399</b>     |
| S 10 vs. L 10   | ns        | >0,9999           | ns       | 0,9998            |
| S 10 vs. L 200  | ns        | 0,2306            | ns       | >0,9999           |
| S 10 vs. H 0    | ns        | 0,2307            | ns       | >0,9999           |
| S 10 vs. H 0,5  | ns        | 0,2731            | ***      | <b>0,0009</b>     |
| S 10 vs. H 10   | ns        | >0,9999           | *        | <b>0,0188</b>     |
| S 10 vs. H 200  | ****      | <b>&lt;0,0001</b> | ns       | 0,1185            |
| S 200 vs. L 0   | ns        | >0,9999           | *        | <b>0,0407</b>     |
| S 200 vs. L 0,5 | *         | <b>0,013</b>      | ns       | 0,8055            |
| S 200 vs. L 10  | ns        | 0,9615            | ns       | 0,4204            |
| S 200 vs. L 200 | ns        | 0,7331            | ns       | 0,6179            |
| S 200 vs. H 0   | ns        | 0,7332            | ns       | 0,5662            |
| S 200 vs. H 0,5 | *         | <b>0,0429</b>     | ****     | <b>&lt;0,0001</b> |
| S 200 vs. H 10  | ns        | 0,9901            | ****     | <b>&lt;0,0001</b> |
| S 200 vs. H 200 | ***       | <b>0,0005</b>     | ***      | <b>0,0007</b>     |
| L 0 vs. L 0,5   | *         | <b>0,0184</b>     | ns       | 0,8881            |
| L 0 vs. L 10    | ns        | 0,9803            | ****     | <b>&lt;0,0001</b> |
| L 0 vs. L 200   | ns        | 0,6549            | ****     | <b>&lt;0,0001</b> |
| L 0 vs. H 0     | ns        | 0,6551            | ****     | <b>&lt;0,0001</b> |
| L 0 vs. H 0,5   | ns        | 0,0586            | ****     | <b>&lt;0,0001</b> |
| L 0 vs. H 10    | ns        | 0,9961            | ****     | <b>&lt;0,0001</b> |
| L 0 vs. H 200   | ***       | <b>0,0003</b>     | ****     | <b>&lt;0,0001</b> |
| L 0,5 vs. L 10  | ns        | 0,3387            | **       | <b>0,0039</b>     |
| L 0,5 vs. L 200 | ****      | <b>&lt;0,0001</b> | *        | <b>0,01</b>       |
| L 0,5 vs. H 0   | ****      | <b>&lt;0,0001</b> | **       | <b>0,0079</b>     |
| L 0,5 vs. H 0,5 | ns        | >0,9999           | ****     | <b>&lt;0,0001</b> |
| L 0,5 vs. H 10  | ns        | 0,2236            | ****     | <b>&lt;0,0001</b> |
| L 0,5 vs. H 200 | ****      | <b>&lt;0,0001</b> | ****     | <b>&lt;0,0001</b> |
| L 10 vs. L 200  | ns        | 0,0673            | ns       | >0,9999           |
| L 10 vs. H 0    | ns        | 0,0673            | ns       | >0,9999           |
| L 10 vs. H 0,5  | ns        | 0,618             | *        | <b>0,0119</b>     |
| L 10 vs. H 10   | ns        | >0,9999           | ns       | 0,1406            |
| L 10 vs. H 200  | ****      | <b>&lt;0,0001</b> | ns       | 0,495             |
| L 200 vs. H 0   | ns        | >0,9999           | ns       | >0,9999           |
| L 200 vs. H 0,5 | ***       | <b>0,0001</b>     | **       | <b>0,0047</b>     |
| L 200 vs. H 10  | ns        | 0,1158            | ns       | 0,0693            |
| L 200 vs. H 200 | ns        | 0,1261            | ns       | 0,3124            |
| H 0 vs. H 0,5   | ***       | <b>0,0001</b>     | **       | <b>0,006</b>      |
| H 0 vs. H 10    | ns        | 0,1159            | ns       | 0,0839            |
| H 0 vs. H 200   | ns        | 0,126             | ns       | 0,3558            |
| H 0,5 vs. H 10  | ns        | 0,4642            | ns       | 0,9989            |
| H 0,5 vs. H 200 | ****      | <b>&lt;0,0001</b> | ns       | 0,9102            |
| H 10 vs. H 200  | ****      | <b>&lt;0,0001</b> | ns       | >0,9999           |
