# Supplementary material for: Endothelial Cell Orientation and Polarity Are Controlled by Shear Stress and VEGF Through Distinct Signaling Pathways
Source: PubMed Central journal article supplement (PMC7960671; doi:10.3389/fphys.2020.623769), 2021-03-02
Supplement: Table_2.pdf [file Table_2.pdf]

**Suppl Table 2**

|                             | VE-cadh 685/VE-cadh |                    | VEGFR2 951 / GAPDH |                    | VEGFR2 1175 / GAPDH |                    | PXL 118 / PXL |                    |
|-----------------------------|---------------------|--------------------|--------------------|--------------------|---------------------|--------------------|---------------|--------------------|
|                             |                     | Individual P Value |                    | Individual P Value |                     | Individual P Value |               | Individual P Value |
| 0:static vs. 0:Low SS       | ***                 | <b>0,0007</b>      | ns                 | 0,4289             | ns                  | 0,5059             | ns            | 0,4202             |
| 0:static vs. 0:High SS      | ns                  | 0,3814             | ns                 | 0,6037             | ns                  | 0,1234             | ns            | 0,2872             |
| 0:static vs. 0,5:static     | *                   | <b>0,0428</b>      | ns                 | 0,4307             | ns                  | 0,8245             | ns            | 0,7449             |
| 0:static vs. 0,5:Low SS     | ****                | <b>&lt;0,0001</b>  | ns                 | 0,0798             | ns                  | 0,2233             | ns            | 0,0797             |
| 0:static vs. 0,5:High SS    | *                   | 0,0263             | ns                 | 0,2753             | ns                  | 0,4337             | ns            | 0,0718             |
| 0:static vs. 10:static      | ***                 | <b>0,0001</b>      | ns                 | 0,4354             | ns                  | 0,2869             | ns            | 0,931              |
| 0:static vs. 10:Low SS      | ***                 | <b>0,0003</b>      | *                  | <b>0,0402</b>      | ***                 | <b>0,0003</b>      | ns            | 0,0785             |
| 0:static vs. 10:High SS     | ns                  | 0,3094             | ns                 | 0,197              | ns                  | 0,0806             | **            | <b>0,0021</b>      |
| 0:static vs. 200:static     | ***                 | <b>0,0008</b>      | **                 | <b>0,0016</b>      | ***                 | <b>0,0004</b>      | ns            | 0,2844             |
| 0:static vs. 200:Low SS     | *                   | <b>0,0263</b>      | ***                | <b>0,0002</b>      | ****                | <b>&lt;0,0001</b>  | *             | <b>0,0477</b>      |
| 0:static vs. 200:High SS    | ns                  | 0,6743             | ns                 | 0,0754             | ***                 | <b>0,0001</b>      | ****          | <b>&lt;0,0001</b>  |
| 0:Low SS vs. 0:High SS      | **                  | <b>0,0062</b>      | ns                 | 0,7838             | ns                  | 0,371              | ns            | 0,7936             |
| 0:Low SS vs. 0,5:static     | ns                  | 0,092              | ns                 | 0,9975             | ns                  | 0,6565             | ns            | 0,6293             |
| 0:Low SS vs. 0,5:Low SS     | ns                  | 0,1451             | ns                 | 0,3228             | ns                  | 0,574              | ns            | 0,3333             |
| 0:Low SS vs. 0,5:High SS    | ns                  | 0,1403             | ns                 | 0,7602             | ns                  | 0,9053             | ns            | 0,3092             |
| 0:Low SS vs. 10:static      | ns                  | 0,492              | ns                 | 0,991              | ns                  | 0,6849             | ns            | 0,4713             |
| 0:Low SS vs. 10:Low SS      | ns                  | 0,7859             | ns                 | 0,1925             | **                  | <b>0,0022</b>      | ns            | 0,3296             |
| 0:Low SS vs. 10:High SS     | **                  | <b>0,0087</b>      | ns                 | 0,6101             | ns                  | 0,2676             | *             | <b>0,0185</b>      |
| 0:Low SS vs. 200:static     | ns                  | 0,9622             | *                  | <b>0,0131</b>      | **                  | <b>0,0024</b>      | ns            | 0,7888             |
| 0:Low SS vs. 200:Low SS     | ns                  | 0,14               | **                 | <b>0,0015</b>      | ****                | <b>&lt;0,0001</b>  | ns            | 0,2288             |
| 0:Low SS vs. 200:High SS    | ***                 | <b>0,0002</b>      | ns                 | 0,3097             | ***                 | 0,0008             | ***           | <b>0,0004</b>      |
| 0:High SS vs. 0,5:static    | ns                  | 0,2244             | ns                 | 0,7862             | ns                  | 0,1841             | ns            | 0,4576             |
| 0:High SS vs. 0,5:Low SS    | ***                 | <b>0,0001</b>      | ns                 | 0,2091             | ns                  | 0,7369             | ns            | 0,4785             |
| 0:High SS vs. 0,5:High SS   | ns                  | 0,1528             | ns                 | 0,5628             | ns                  | 0,437              | ns            | 0,4482             |
| 0:High SS vs. 10:static     | **                  | <b>0,0011</b>      | ns                 | 0,7924             | ns                  | 0,6224             | ns            | 0,3275             |
| 0:High SS vs. 10:Low SS     | **                  | <b>0,0032</b>      | ns                 | 0,1173             | *                   | <b>0,022</b>       | ns            | 0,4738             |
| 0:High SS vs. 10:High SS    | ns                  | 0,8845             | ns                 | 0,4342             | ns                  | 0,827              | *             | <b>0,0345</b>      |
| 0:High SS vs. 200:static    | **                  | <b>0,0069</b>      | **                 | <b>0,0065</b>      | *                   | <b>0,0237</b>      | ns            | 0,995              |
| 0:High SS vs. 200:Low SS    | ns                  | 0,1531             | ***                | <b>0,0007</b>      | ****                | <b>&lt;0,0001</b>  | ns            | 0,3439             |
| 0:High SS vs. 200:High SS   | ns                  | 0,2002             | ns                 | 0,1995             | **                  | <b>0,009</b>       | ***           | <b>0,0009</b>      |
| 0,5:static vs. 0,5:Low SS   | **                  | <b>0,0033</b>      | ns                 | 0,3213             | ns                  | 0,3165             | ns            | 0,1499             |
| 0,5:static vs. 0,5:High SS  | ns                  | 0,8203             | ns                 | 0,7578             | ns                  | 0,5734             | ns            | 0,1367             |
| 0,5:static vs. 10:static    | *                   | <b>0,0218</b>      | ns                 | 0,9936             | ns                  | 0,3968             | ns            | 0,8111             |
| 0,5:static vs. 10:Low SS    | ns                  | 0,0536             | ns                 | 0,1914             | ***                 | <b>0,0006</b>      | ns            | 0,1479             |
| 0,5:static vs. 10:High SS   | ns                  | 0,2821             | ns                 | 0,6079             | ns                  | 0,1241             | **            | <b>0,0052</b>      |
| 0,5:static vs. 200:static   | ns                  | 0,1007             | *                  | <b>0,013</b>       | ***                 | <b>0,0007</b>      | ns            | 0,4538             |
| 0,5:static vs. 200:Low SS   | ns                  | 0,8213             | **                 | <b>0,0015</b>      | ****                | <b>&lt;0,0001</b>  | ns            | 0,0947             |
| 0,5:static vs. 200:High SS  | *                   | <b>0,017</b>       | ns                 | 0,3082             | ***                 | <b>0,0002</b>      | ****          | <b>&lt;0,0001</b>  |
| 0,5:Low SS vs. 0,5:High SS  | **                  | <b>0,0058</b>      | ns                 | 0,4916             | ns                  | 0,6572             | ns            | 0,9601             |
| 0,5:Low SS vs. 10:static    | ns                  | 0,4269             | ns                 | 0,3174             | ns                  | 0,8752             | ns            | 0,0949             |
| 0,5:Low SS vs. 10:Low SS    | ns                  | 0,2301             | ns                 | 0,7465             | **                  | <b>0,0097</b>      | ns            | 0,994              |
| 0,5:Low SS vs. 10:High SS   | ***                 | <b>0,0002</b>      | ns                 | 0,6285             | ns                  | 0,5798             | ns            | 0,1504             |
| 0,5:Low SS vs. 200:static   | ns                  | 0,1333             | ns                 | 0,1164             | *                   | <b>0,0105</b>      | ns            | 0,4824             |
| 0,5:Low SS vs. 200:Low SS   | **                  | <b>0,0057</b>      | *                  | <b>0,0203</b>      | ****                | <b>&lt;0,0001</b>  | ns            | 0,8101             |
| 0,5:Low SS vs. 200:High SS  | ****                | <b>&lt;0,0001</b>  | ns                 | 0,9779             | **                  | <b>0,0037</b>      | **            | <b>0,0072</b>      |
| 0,5:High SS vs. 10:static   | *                   | <b>0,0359</b>      | ns                 | 0,7516             | ns                  | 0,774              | ns            | 0,0858             |
| 0,5:High SS vs. 10:Low SS   | ns                  | 0,0845             | ns                 | 0,3143             | **                  | <b>0,003</b>       | ns            | 0,9661             |
| 0,5:High SS vs. 10:High SS  | ns                  | 0,196              | ns                 | 0,8373             | ns                  | 0,321              | ns            | 0,1646             |
| 0,5:High SS vs. 200:static  | ns                  | 0,1526             | *                  | <b>0,0271</b>      | **                  | <b>0,0033</b>      | ns            | 0,452              |
| 0,5:High SS vs. 200:Low SS  | ns                  | 0,999              | **                 | <b>0,0035</b>      | ****                | <b>&lt;0,0001</b>  | ns            | 0,8491             |
| 0,5:High SS vs. 200:High SS | *                   | <b>0,0101</b>      | ns                 | 0,4744             | **                  | <b>0,0011</b>      | **            | 0,0082             |
| 10:static vs. 10:Low SS     | ns                  | 0,676              | ns                 | 0,1888             | **                  | <b>0,0065</b>      | ns            | 0,0935             |
| 10:static vs. 10:High SS    | **                  | <b>0,0016</b>      | ns                 | 0,6023             | ns                  | 0,478              | **            | <b>0,0027</b>      |
| 10:static vs. 200:static    | ns                  | 0,4631             | *                  | <b>0,0127</b>      | **                  | <b>0,007</b>       | ns            | 0,3245             |
| 10:static vs. 200:Low SS    | *                   | <b>0,0358</b>      | **                 | <b>0,0015</b>      | ****                | <b>&lt;0,0001</b>  | ns            | 0,0576             |
| 10:static vs. 200:High SS   | ****                | <b>&lt;0,0001</b>  | ns                 | 0,3045             | **                  | <b>0,0024</b>      | ****          | <b>&lt;0,0001</b>  |
| 10:Low SS vs. 10:High SS    | **                  | <b>0,0045</b>      | ns                 | 0,4211             | *                   | <b>0,0364</b>      | ns            | 0,1524             |
| 10:Low SS vs. 200:static    | ns                  | 0,7498             | ns                 | 0,2077             | ns                  | 0,9743             | ns            | 0,4777             |
| 10:Low SS vs. 200:Low SS    | ns                  | 0,0843             | *                  | <b>0,0426</b>      | **                  | <b>0,0053</b>      | ns            | 0,816              |
| 10:Low SS vs. 200:High SS   | ***                 | <b>0,0001</b>      | ns                 | 0,7676             | ns                  | 0,7146             | **            | 0,0073             |
| 10:High SS vs. 200:static   | **                  | <b>0,0098</b>      | *                  | <b>0,0431</b>      | *                   | <b>0,0391</b>      | *             | 0,035              |
| 10:High SS vs. 200:Low SS   | ns                  | 0,1965             | **                 | <b>0,0061</b>      | ****                | <b>&lt;0,0001</b>  | ns            | 0,2284             |
| 10:High SS vs. 200:High SS  | ns                  | 0,1562             | ns                 | 0,609              | *                   | <b>0,0155</b>      | ns            | 0,1841             |
| 200:static vs. 200:Low SS   | ns                  | 0,1523             | ns                 | 0,418              | **                  | <b>0,0049</b>      | ns            | 0,3471             |
| 200:static vs. 200:High SS  | ***                 | <b>0,0003</b>      | ns                 | 0,1227             | ns                  | 0,6907             | ***           | <b>0,001</b>       |
| 200:Low SS vs. 200:High SS  | *                   | <b>0,0101</b>      | *                  | <b>0,0217</b>      | *                   | <b>0,0135</b>      | *             | <b>0,0134</b>      |
